# Supplementary material
Source: PubMed Central journal article supplement (PMC3993330)
Supplement: JB.00036-14_zjb999093134so1.pdf [file JB.00036-14_zjb999093134so1.pdf]

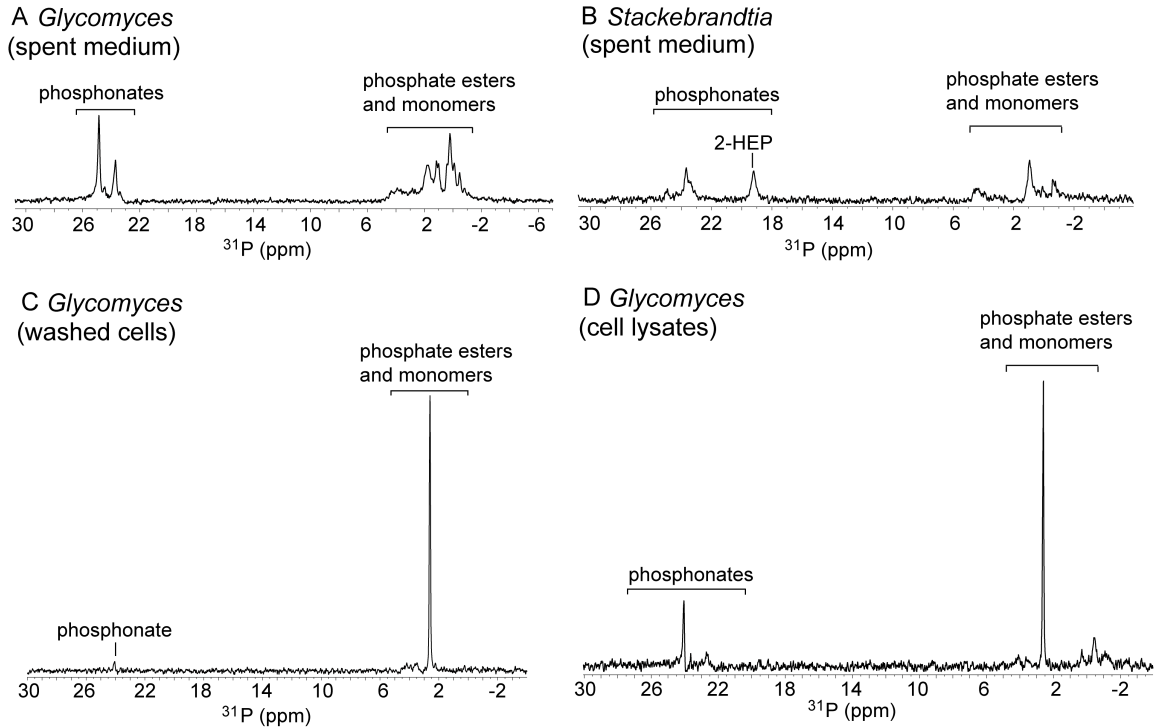

1  
2 **Fig. S1.  $^{31}\text{P}$  NMR spectra of phosphonates from *Glycomyces* and *Stackebrandtia*.** (A)  
3 Concentrated culture extract of *Glycomyces* shows the presence of phosphonates. (B)  
4 Concentrated culture extract of *Stackebrandtia* shows the presence of phosphonates. (C) Washed  
5 cells of *Glycomyces* contain a small amount of phosphonates. (D) Lysozyme treatment of the  
6 sample in (C) releases cell-bound phosphonates. Concentrated culture extracts were  
7 supplemented with 20%  $\text{D}_2\text{O}$  for  $^{31}\text{P}$  NMR analyses, as shown in (A) and (B). *Glycomyces* cells  
8 (750 mg wet weight) were harvested and washed three times with 10 mM Tris buffer (pH=7.0).  
9 Washed buffers were combined, dried and redissolved in  $\text{D}_2\text{O}$  for  $^{31}\text{P}$  NMR analysis, as shown in  
10 (C). Washed cells were resuspended in 10 mM Tris buffer (pH=7.0) and treated with DNase,  
11 RNase and proteinase K. Enzymes were inactivated by successive extractions with  
12 phenol:chloroform:isoamyl (25:24:1) and chloroform:isoamyl (24:1) and centrifugations. The  
13 aqueous phase collected was filtered using a 10 kDa Amicon filter. The retentate on the filter was  
14 washed 10 times with water, lyophilized, resuspended in 20%  $\text{D}_2\text{O}$  for  $^{31}\text{P}$  NMR analysis, as  
15 shown in (D). P peaks with chemical shifts between 5 and 40 ppm are usually indicative of  
16 phosphonates and phosphinates whereas P peaks between +5 to -20 ppm range are usually  
17 phosphate monomers, esters and pyrophosphates.

18  
19  
20  
21

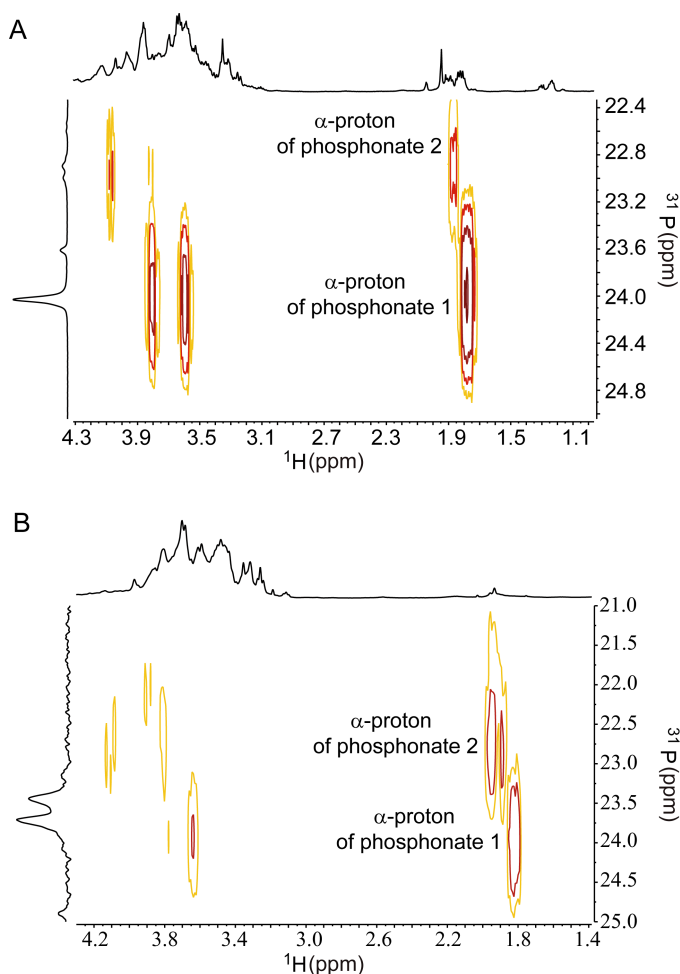

23

24 **Fig. S2.  $^1\text{H}$ - $^{31}\text{P}$  HMBC spectra of purified phosphonoglycans from *Glycomyces* (A) and**  
 25 ***Stackebrandtia* (B).** In the  $^1\text{H}$ - $^{31}\text{P}$  HMBC spectrum of purified phosphonoglycans from  
 26 *Glycomyces* (A), the major  $^{31}\text{P}$  signal at 24.03 ppm had cross-peaks with three proton signals at  
 27 1.78, 3.59 and 3.80 ppm. The proton signal at 1.78 and 3.59 ppm was assigned to  $\text{CH}_2\text{P}$  and  
 28  $\text{CH}_2\text{OH}$  of a phosphonate head group, respectively, by  $^1\text{H}$ - $^1\text{H}$  COSY correlations of H-1 with  
 29 H-2. The proton signal at 3.80 ppm may originate from a phosphonate ester. There were two  
 30 minor  $^{31}\text{P}$  signals at 22.89 and 22.99 ppm. One of them (or both) had cross-peaks with three  
 31 proton signals at 1.86 (assigned to  $\text{CH}_2\text{P}$  of a phosphonate), 3.81 and 4.07 ppm.  $^{31}\text{P}$  signal  
 32 overlapping in this region prevented assignments of other proton signals. In the  $^1\text{H}$ - $^{31}\text{P}$  HMBC  
 33 spectrum of purified phosphonoglycans from *Stackebrandtia* (B), the  $^{31}\text{P}$  signal at 23.71 ppm had  
 34 cross-peaks with three protons signals at 1.81, 3.64 and 3.78 ppm. The proton signals at 1.81  
 35 and 3.64 ppm were assigned to  $\text{CH}_2\text{P}$  and  $\text{CH}_2\text{OH}$  of a phosphonate head group, respectively,  
 36 by  $^1\text{H}$ - $^1\text{H}$  COSY correlations of H-1 with H-2. The proton signal at 3.78 ppm may originate  
 37 from a phosphonate ester. The  $^{31}\text{P}$  signal at 23.45 ppm had a cross-peak with the proton  
 38 signal at 1.94 ppm (assigned to  $\text{CH}_2\text{P}$  of a phosphonate) and possibly also had cross-peaks  
 39 with proton signals at 3.81 and 4.11 ppm. The proton signals at 3.81 and 4.11 ppm could not

40 be confidently assigned due to low signal intensities.

41

42

43

44

45

46

47

48

49

50

51

52

53

54

55

56

57

58

59

60

61

62

63

64

65

66

67

68

69

70

71

72

73

74

75

76

77

78

79

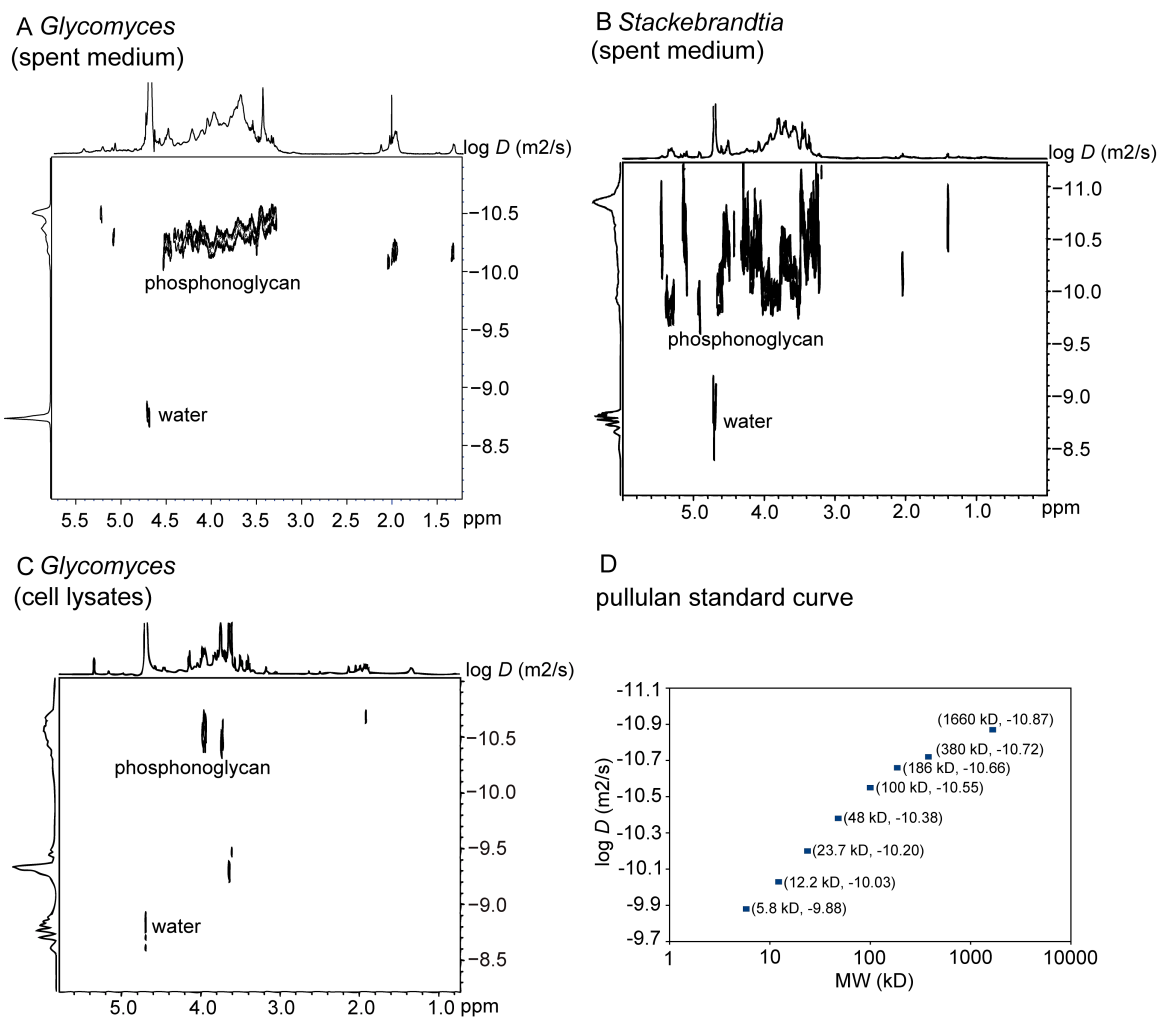

81

82 **Fig. S3. <sup>1</sup>H DOSY NMR spectra of phosphonoglycans from *Glycomyces* and *Stackebrandtia*.**83 (A) <sup>1</sup>H DOSY NMR spectrum of *Glycomyces* phosphonoglycans purified from the culture extract.84 (B) <sup>1</sup>H DOSY NMR spectrum of *Stackebrandtia* phosphonoglycans purified from the culture extract.85 (C) <sup>1</sup>H DOSY NMR spectrum of *Glycomyces* cell-bound phosphonoglycans. (D) A standard curve86 to plot log MW v.s. log *D* of a series of Shodex pullulan standards (in the range of 5.8 and 166087 kDa) in D<sub>2</sub>O. The x axis in the <sup>1</sup>H DOSY NMR spectrum shows proton chemical shifts whereas the88 y axis shows the diffusion coefficients (log *D*) of compounds. The standard curve can be used

89 to determine the approximate molecular weights of phosphonoglycans. The proton signal at 4.6 ppm

90 in (A), (B) and (C) originates from water.

91

92

93

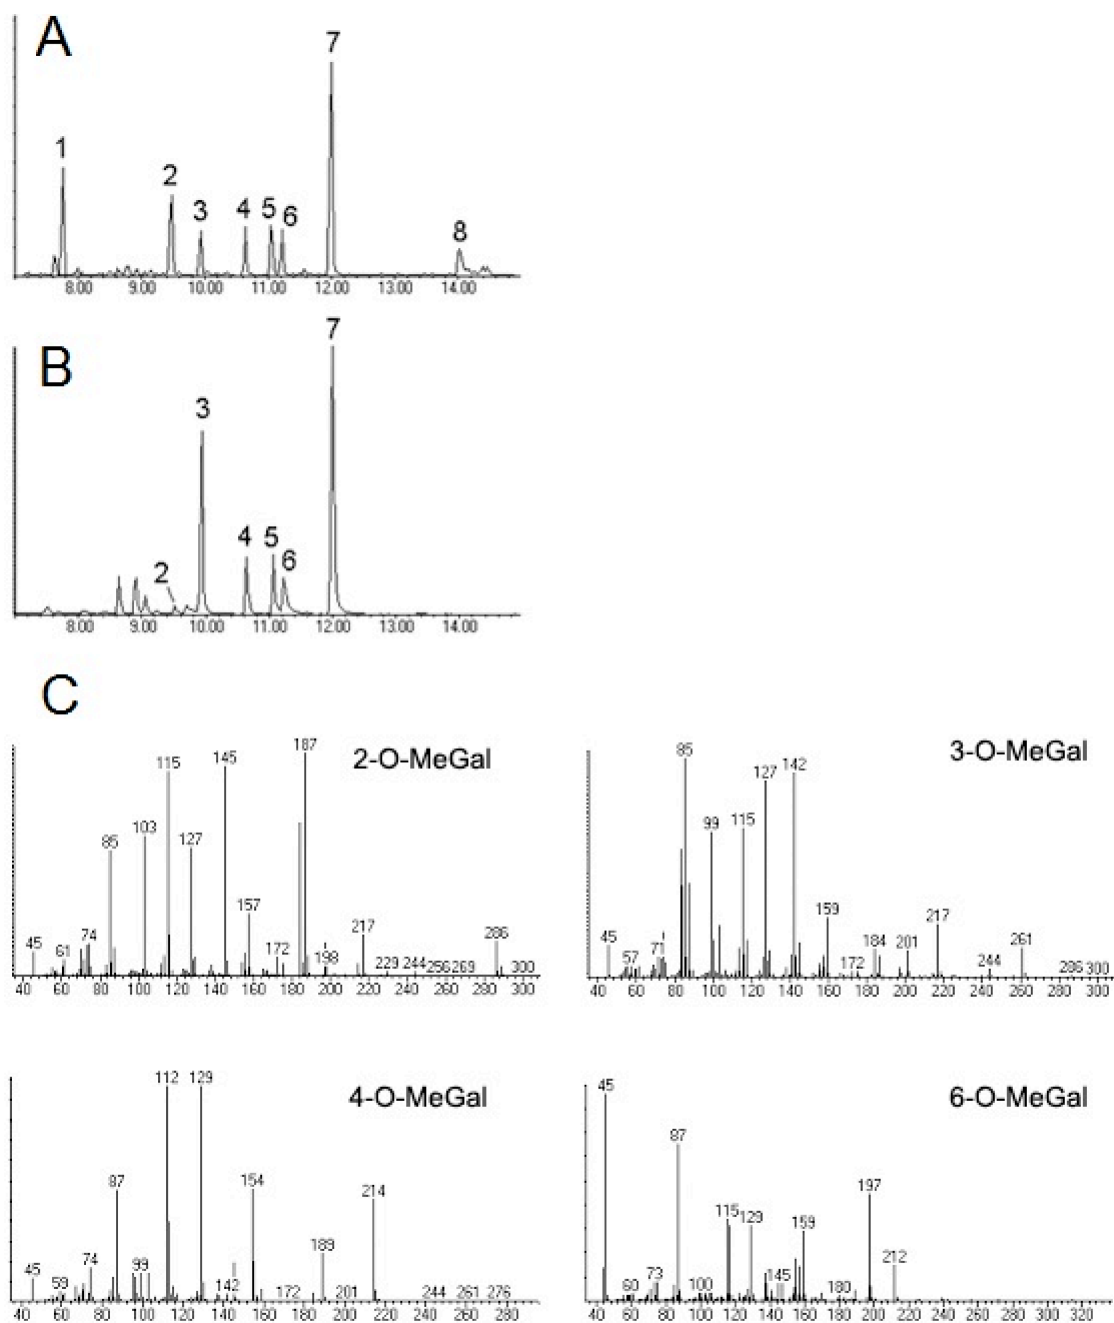

95

96

**Fig. S4. GC chromatographs of acid labile monosaccharide composition from the major phosphonoglycan of *Glycomyces* (A) and partially O-methylated galactose standards (B).**

97

(C) EI-MS spectra for GC peaks 3, 4, 5 and 6. 1. Xyl; 2. 2,3-diMeGal; 3. 6-MeGal; 4. 2-MeGal; 5. 3-MeGal; 6. 4-MeGal; 7. Gal; 8. GlcNAc.

99

100

101

102

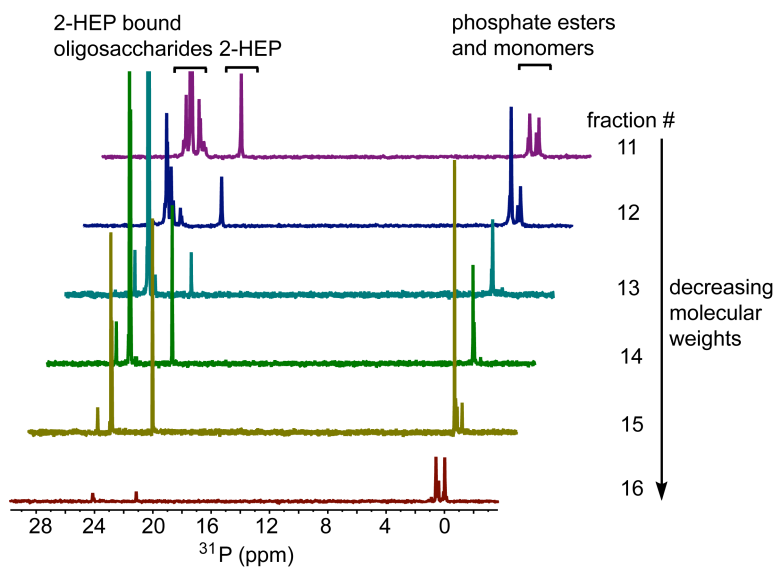

103

104 **Fig. S5. Partial acid hydrolysis of *Glycomyces* phosphonoglycans produced various**  
105 **polymeric fragments containing different amounts of 2-HEP bound oligosaccharides and**  
106 **unbound 2-HEP.** Fractions #11 to #16 were phosphonate-containing fractions eluted from Bio-Gel  
107 P2 column (Bio-Rad). The identity of the peak with the chemical shift of 21.2 ppm was confirmed to  
108 be 2-HEP by spiking the sample with an authentic 2-HEP standard. Fractions #14 to #16 were  
109 pooled for subsequent purification and characterization.

110

111

112

113

114

115

116

117

118

119

120

121

122

123

124

125

126

127

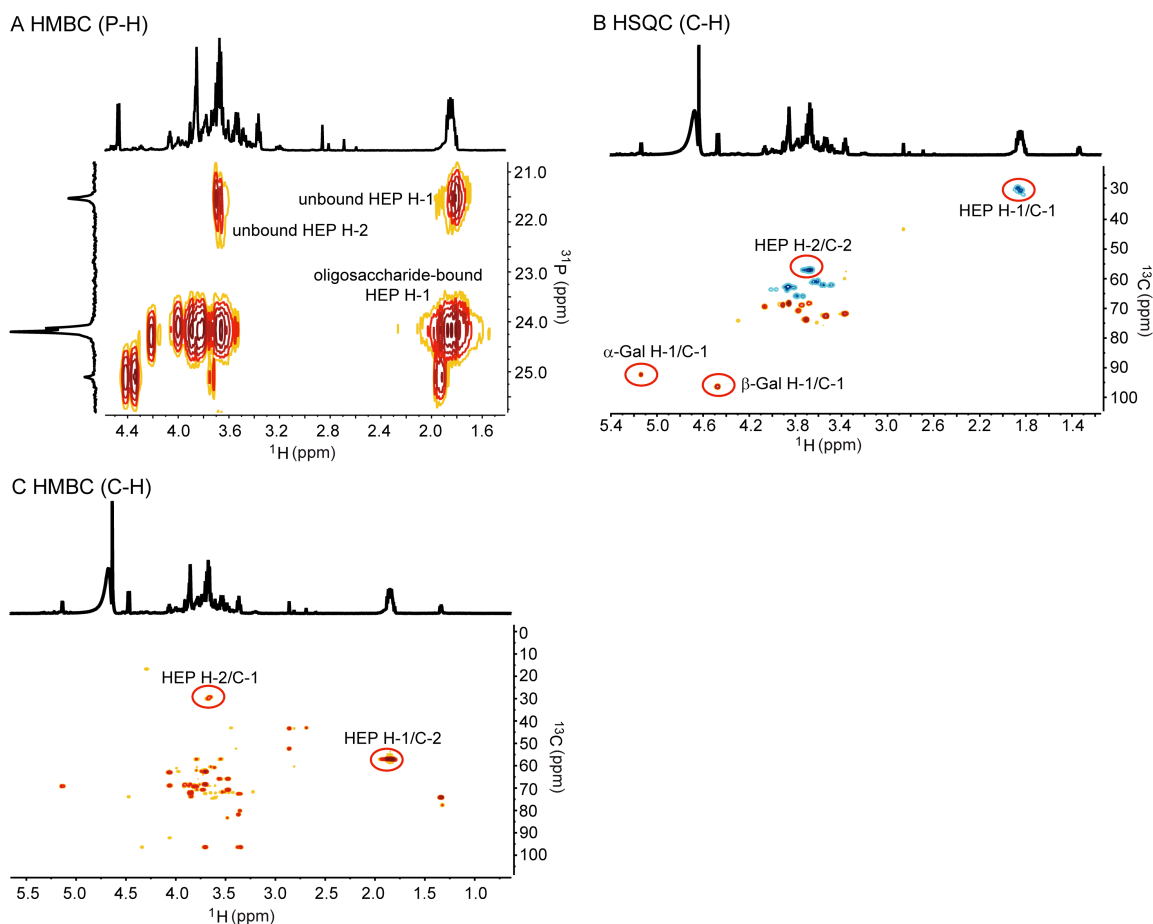

128  
 129  
 130  
 131  
 132  
 133  
 134  
 135  
 136  
 137  
 138  
 139  
 140  
 141  
 142  
 143  
 144  
 145

**Fig. S6. 2D NMR analyses of retentate (MWCO= 0.5-1.0 kDa) after partial acid hydrolysis of *Glycomyces phosphonoglycans*.** (A)  $^1\text{H}$ - $^{31}\text{P}$  HMBC spectrum. (B)  $^1\text{H}$ - $^{13}\text{C}$  HSQC spectrum. (C)  $^1\text{H}$ - $^{13}\text{C}$  HMBC spectrum. In the  $^1\text{H}$ - $^{31}\text{P}$  HMBC spectrum, the proton signal at 1.86 ppm had a cross-peak with one of the  $^{31}\text{P}$  signals (or both) at 24.14 and 24.20 ppm. This was assigned to H-1 of the 2-HEP moiety, which was likely bound to oligosaccharides. C-1 (30.1 ppm) of the 2-HEP moiety, determined by the  $^1\text{H}$ - $^{13}\text{C}$  HSQC NMR experiment, had only one correlation with a proton signal at 3.67 ppm in the  $^1\text{H}$ - $^{13}\text{C}$  HMBC spectrum. This proton was assigned to H-2 of the 2-HEP moiety, which also showed the correlation with the  $^{31}\text{P}$  signal at 24.14 (or 24.20) ppm in the  $^1\text{H}$ - $^{31}\text{P}$  HMBC spectrum. H-2 of 2-HEP only had one correlation with C-1 of 2-HEP but not with any other carbons in the  $^1\text{H}$ - $^{13}\text{C}$  HMBC spectrum, excluding the possibility of an ether linkage between 2-HEP and sugars.

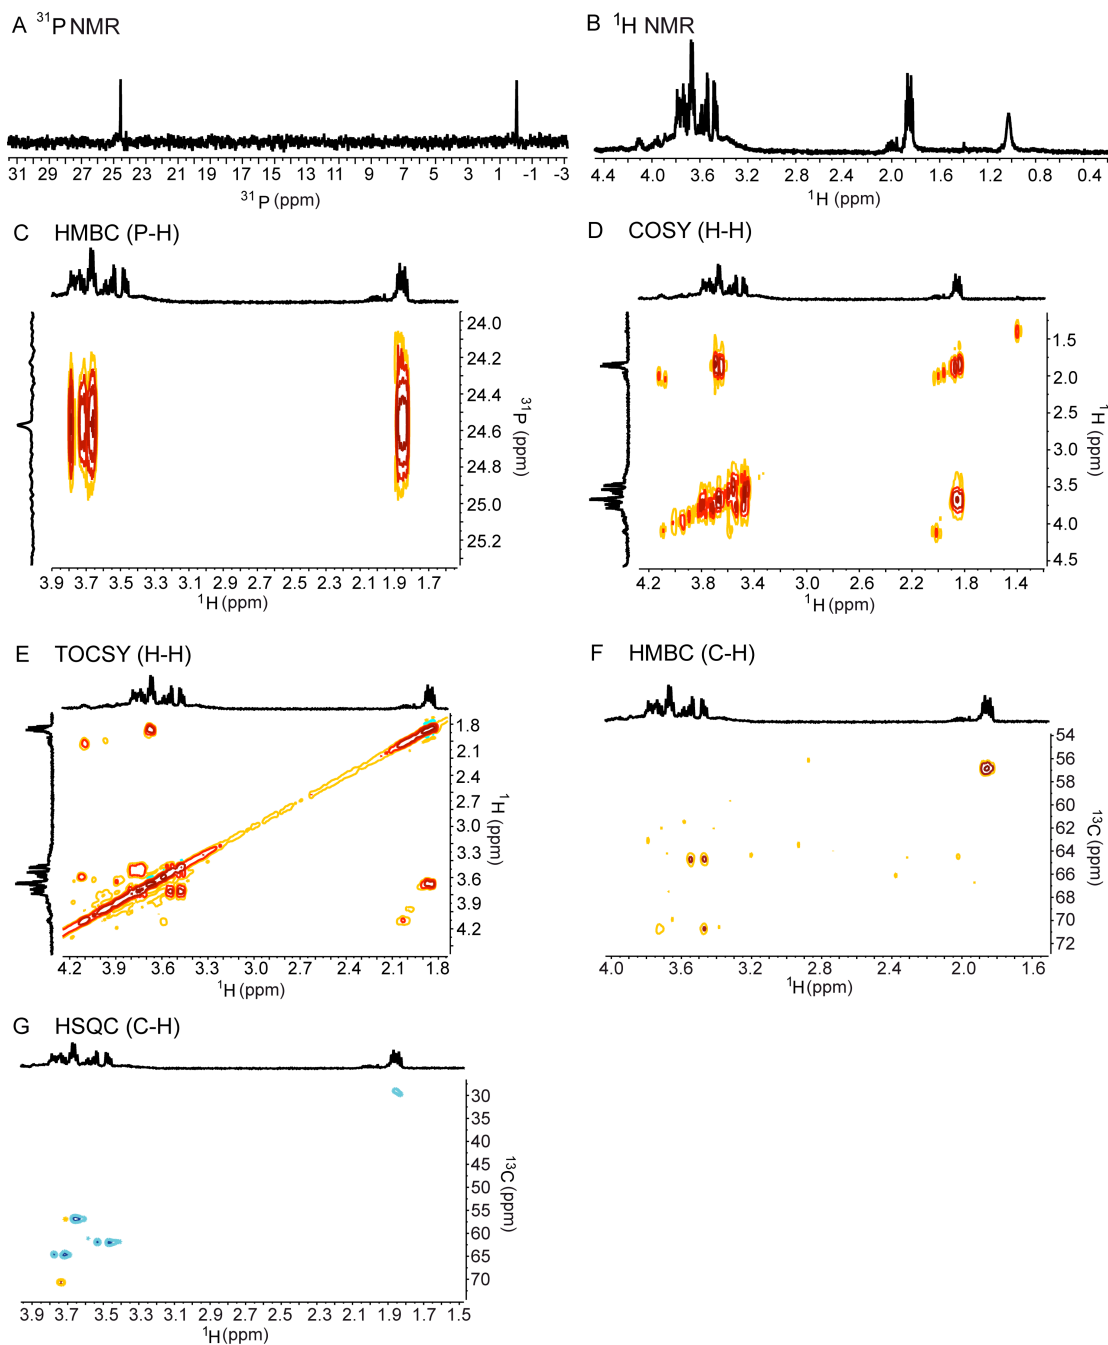

147

148 **Fig. S7. 1D and 2D NMR analyses of 2-HEP mono(2,3-dihydroxypropyl) ester after partial**  
 149 **acid hydrolysis of *Stackebrandtia* phosphonoglycans.** (A)  $^{31}\text{P}$  NMR spectrum. (B)  $^1\text{H}$  NMR  
 150 spectrum. (C)  $^1\text{H}$ - $^{31}\text{P}$  HMBC spectrum. (D)  $^1\text{H}$ - $^1\text{H}$  COSY NMR spectrum. (E)  $^1\text{H}$ - $^1\text{H}$  TOCSY NMR  
 151 spectrum. (F)  $^1\text{H}$ - $^{13}\text{C}$  HMBC spectrum. (G)  $^1\text{H}$ - $^{13}\text{C}$  HSQC spectrum. In the  $^1\text{H}$ - $^{31}\text{P}$  HMBC  
 152 spectrum, four proton signals at 1.85, 3.67, 3.72 and 3.78 ppm, had cross-peaks with the  $^{31}\text{P}$   
 153 signal at 24.5 ppm. The proton signals at 1.85 and 3.67 ppm were assigned to  $\text{CH}_2\text{P}$  and  
 154  $\text{CH}_2\text{OH}$  of the 2-HEP moiety, respectively, by  $^1\text{H}$ - $^1\text{H}$  COSY and  $^1\text{H}$ - $^1\text{H}$  TOCSY correlations of



155 H-1 with H-2 and  $^1\text{H}$ - $^{13}\text{C}$  HMBC correlations of H-1 with C-2. Proton signals at 3.72 and 3.78  
156 ppm are both from C-1', as evident from  $^1\text{H}$ - $^{13}\text{C}$  HMBC correlations of H-1' with C-2' but not  
157 with C-1 or C-2. Additionally, two cross-peaks were found between the proton signal at 3.47  
158 ppm and the carbon signals at 64.8 (C-1') and 70.7 (C-2') ppm. This proton signal was  
159 assigned to H-3', consistent with  $^1\text{H}$ - $^1\text{H}$  TOCSY correlations of H-2' with H-3'. Together, these  
160 data allow to assign the structure as 2-HEP mono(2,3-dihydroxypropyl) ester.

161

162

163

164

165

166

167

168

169

170

171

172

173

174

175

176

177

178

179

180

181

182

183

184

185

186

187

188

189

190

191

192

193

194

195

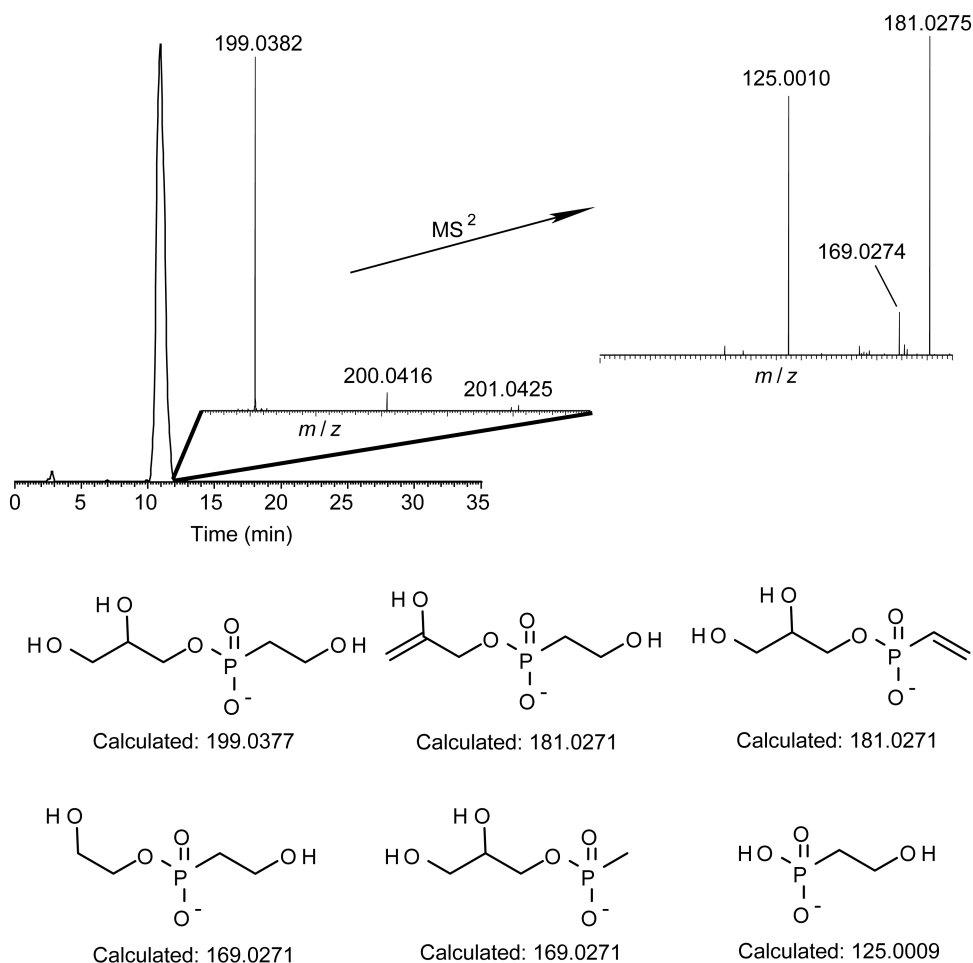

197

198

199

200

201

202

203

204

205

206

207

208

209

210

211

212

**Fig. S8. High resolution LC-MS analysis of 2-HEP mono(2,3-dihydroxypropyl) ester after partial acid hydrolysis of *Stackebrandtia* phosphonoglycans.** The precursor ion at  $m/z$  199.0382 indicates HEP-linked glycerol, namely, 2-HEP mono(2,3-dihydroxypropyl) ester. This ion was selected for MS<sup>2</sup>. Proposed ion structures were shown at the bottom. The peak labels in the spectrum indicate observed values whereas the numbers below the proposed ion structures indicate calculated monoisotopic values. LC-MS analysis was performed on a custom 11T linear ion-trap Fourier-transform mass spectrometer (LTQ-FT, Thermo Fisher Scientific) equipped with a 1200 HPLC system (Agilent). The mass spectral analysis consisted of a full scan at resolution 100,000 ( $m/z$  100-1000), a source fragmentation scan (85V,  $m/z$  50-110) detected in the ion trap and a targeted CID MS<sup>2</sup> scan with FT detection to obtain tandem mass spectra of target compounds.

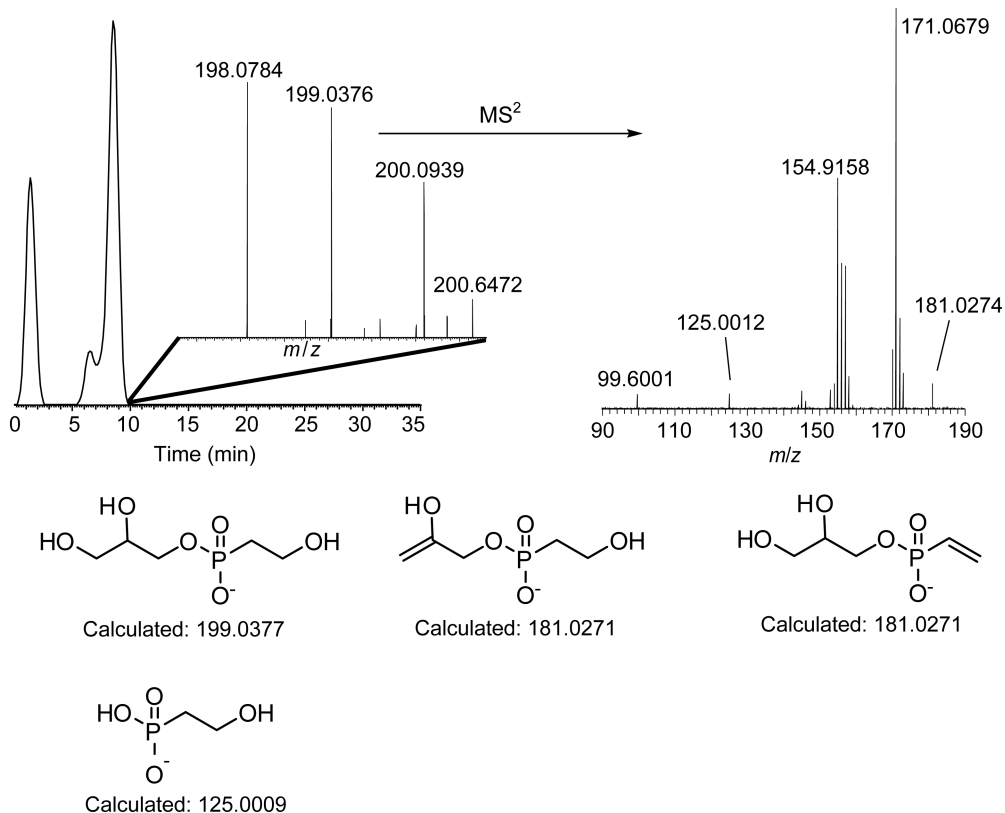

213

214 **Fig. S9. High resolution LC-MS analysis of 2-HEP mono(2,3-dihydroxypropyl) ester after**

215 **partial acid hydrolysis of *Glycomyces phosphonoglycans*.** The precursor ion at  $m/z$  199.0376

216 indicates HEP-linked glycerol, namely, 2-HEP mono(2,3-dihydroxypropyl) ester. This ion was

217 selected for MS<sup>2</sup>. Proposed ion structures were shown at the bottom. The peak labels in the

218 spectrum indicate observed values whereas the numbers below the proposed ion structures

219 indicate calculated monoisotopic values. LC-MS analysis was performed on a custom 11T

220 linear ion-trap Fourier-transform mass spectrometer (LTQ-FT, Thermo Fisher Scientific)

221 equipped with a 1200 HPLC system (Agilent). The mass spectral analysis consisted of a full

222 scan at resolution 100,000 ( $m/z$  100-1000), a source fragmentation scan (85V,  $m/z$  50-110)

223 detected in the ion trap and a targeted CID MS<sup>2</sup> scan with FT detection to obtain tandem

224 mass spectra of target compounds.

225

226

227

228

229

230

231

232

233

234

235 **Table S1.** Summary of ORFs in putative phosphonoglycan biosynthetic locus of  
 236 *Stackebrandtia*

| ORF | No. of amino acids | Predicted function (GenBank accession)                                |
|-----|--------------------|-----------------------------------------------------------------------|
| 1'  | 116                | ABC transporter (YP_003514402)                                        |
| 2'  | 474                | nucleotide sugar dehydrogenase (YP_003514401)                         |
| 3'  | 310                | endonuclease/exonuclease/phosphatase (YP_003514400)                   |
| 4'  | 193                | hypothetical protein Snas_5676 (YP_003514399)                         |
| 5'  | 704                | LmbE family protein (YP_003514398)                                    |
| 6'  | 762                | glycosyl transferase group 1 (YP_003514397)                           |
| 7'  | 549                | N-acetylglucosamine phosphotransferase (YP_003514396)                 |
| 8'  | 593                | N-acetylglucosamine phosphotransferase (YP_003514395)                 |
| 9'  | 685                | CDP-alcohol phosphatidyltransferase (YP_003514394)                    |
| 10' | 253                | ABC transporter related protein (YP_003514393)                        |
| 11' | 291                | CDP-alcohol phosphatidyltransferase (YP_003514392)                    |
| 12' | 239                | 2-C-methyl-D-erythritol 4-phosphate cytidyltransferase (YP_003514391) |
| 13' | 551                | hypothetical protein Snas_5667 (YP_003514390)                         |
| 14' | 569                | hypothetical protein Snas_5666 (YP_003514389)                         |
| 15' | 437                | PEP mutase (YP_003514388)                                             |

---

|     |     |                                                                    |
|-----|-----|--------------------------------------------------------------------|
| 16' | 373 | phosphonopyruvate decarboxylase (YP_003514387)                     |
| 17' | 386 | iron-containing alcohol dehydrogenase (YP_003514386)               |
| 18' | 238 | hypothetical protein Snas_5662 (YP_003514385)                      |
| 19' | 138 | hypothetical protein Snas_5661 (YP_003514384)                      |
| 20' | 106 | hypothetical protein Snas_5660 (YP_003514383)                      |
| 21' | 237 | hypothetical protein Snas_5659 (YP_003514382)                      |
| 22' | 196 | hypothetical protein Snas_5658 (YP_003514381)                      |
| 23' | 102 | hypothetical protein Snas_5657 (YP_003514380)                      |
| 24' | 662 | major facilitator superfamily protein (YP_003514379)               |
| 25' | 239 | flavoprotein (YP_003514378)                                        |
| 26' | 449 | radical SAM protein (YP_003514377)                                 |
| 27' | 222 | NAD-dependent epimerase/dehydratase (YP_003514376)                 |
| 28' | 143 | glyoxalase/bleomycin resistance protein/dioxygenase (YP_003514375) |
| 29' | 219 | GntR family transcriptional regulator (YP_003514374)               |

---
